# Supplementary material
Source: HighWire-hosted journal article supplement (https://fn.bmj.com/content/104/3/F235)

Supplementary File 1:

Table showing median weights in kilograms (Wt) grouped by gestational age at birth. Number of infants remaining in study also presented (N).

| **Gestational age at birth** | | **Week of Postmenstrual Age** | | | | | | | | | | | | | |
| --- | --- | --- | --- | --- | --- | --- | --- | --- | --- | --- | --- | --- | --- | --- | --- |
| **23** | **24** | **25** | **26** | **27** | **28** | **29** | **30** | **31** | **32** | **33** | **34** | **35** | **36** |
| **23** | **N** | 13 | 12 | 10 | 10 | 10 | 10 | 10 | 10 | 9 | 8 | 7 | 6 | 6 | 6 |
|  | **Wt** | 0.60 | 0.70 | 0.75 | 0.84 | 0.86 | 1.00 | 1.10 | 1.26 | 1.44 | 1.57 | 1.79 | 1.91 | 2.09 | 2.28 |
| **24** | **N** |  | 36 | 36 | 34 | 33 | 32 | 31 | 29 | 29 | 26 | 23 | 20 | 21 | 20 |
|  | **Wt** |  | 0.68 | 0.74 | 0.82 | 0.87 | 1.04 | 1.11 | 1.25 | 1.45 | 1.74 | 1.89 | 2.01 | 2.34 | 2.62 |
| **25** | **N** |  |  | 43 | 43 | 42 | 41 | 40 | 39 | 38 | 36 | 31 | 30 | 29 | 26 |
|  | **Wt** |  |  | 0.77 | 0.82 | 0.91 | 1.05 | 1.16 | 1.30 | 1.41 | 1.60 | 1.85 | 2.06 | 2.32 | 2.53 |
| **26** | **N** |  |  |  | 39 | 39 | 36 | 36 | 34 | 31 | 29 | 29 | 27 | 25 | 24 |
|  | **Wt** |  |  |  | 0.93 | 1.01 | 1.08 | 1.21 | 1.34 | 1.51 | 1.72 | 1.90 | 2.22 | 2.42 | 2.66 |
| **27** | **N** |  |  |  |  | 51 | 49 | 44 | 42 | 38 | 34 | 30 | 25 | 22 | 19 |
|  | **Wt** |  |  |  |  | 1.03 | 1.09 | 1.20 | 1.39 | 1.53 | 1.70 | 1.84 | 2.07 | 2.27 | 2.36 |
| **28** | **N** |  |  |  |  |  | 66 | 65 | 60 | 60 | 56 | 55 | 50 | 44 | 36 |
|  | **Wt** |  |  |  |  |  | 1.09 | 1.17 | 1.28 | 1.45 | 1.70 | 1.99 | 2.15 | 2.29 | 2.40 |
| **29** | **N** |  |  |  |  |  |  | 37 | 37 | 33 | 31 | 31 | 30 | 29 | 23 |
|  | **Wt** |  |  |  |  |  |  | 1.25 | 1.30 | 1.40 | 1.67 | 1.92 | 2.11 | 2.24 | 2.45 |
| **30** | **N** |  |  |  |  |  |  |  | 43 | 42 | 36 | 36 | 36 | 29 | 22 |
|  | **Wt** |  |  |  |  |  |  |  | 1.41 | 1.48 | 1.68 | 1.89 | 2.05 | 2.06 | 2.32 |
| **31** | **N** |  |  |  |  |  |  |  |  | 68 | 64 | 61 | 54 | 39 | 24 |
|  | **Wt** |  |  |  |  |  |  |  |  | 1.56 | 1.70 | 1.93 | 2.07 | 2.18 | 2.39 |

Figure showing longitudinal median weight plots for female (a) and male (b) infants displayed separately by gestation at birth superimposed on NICM centile line


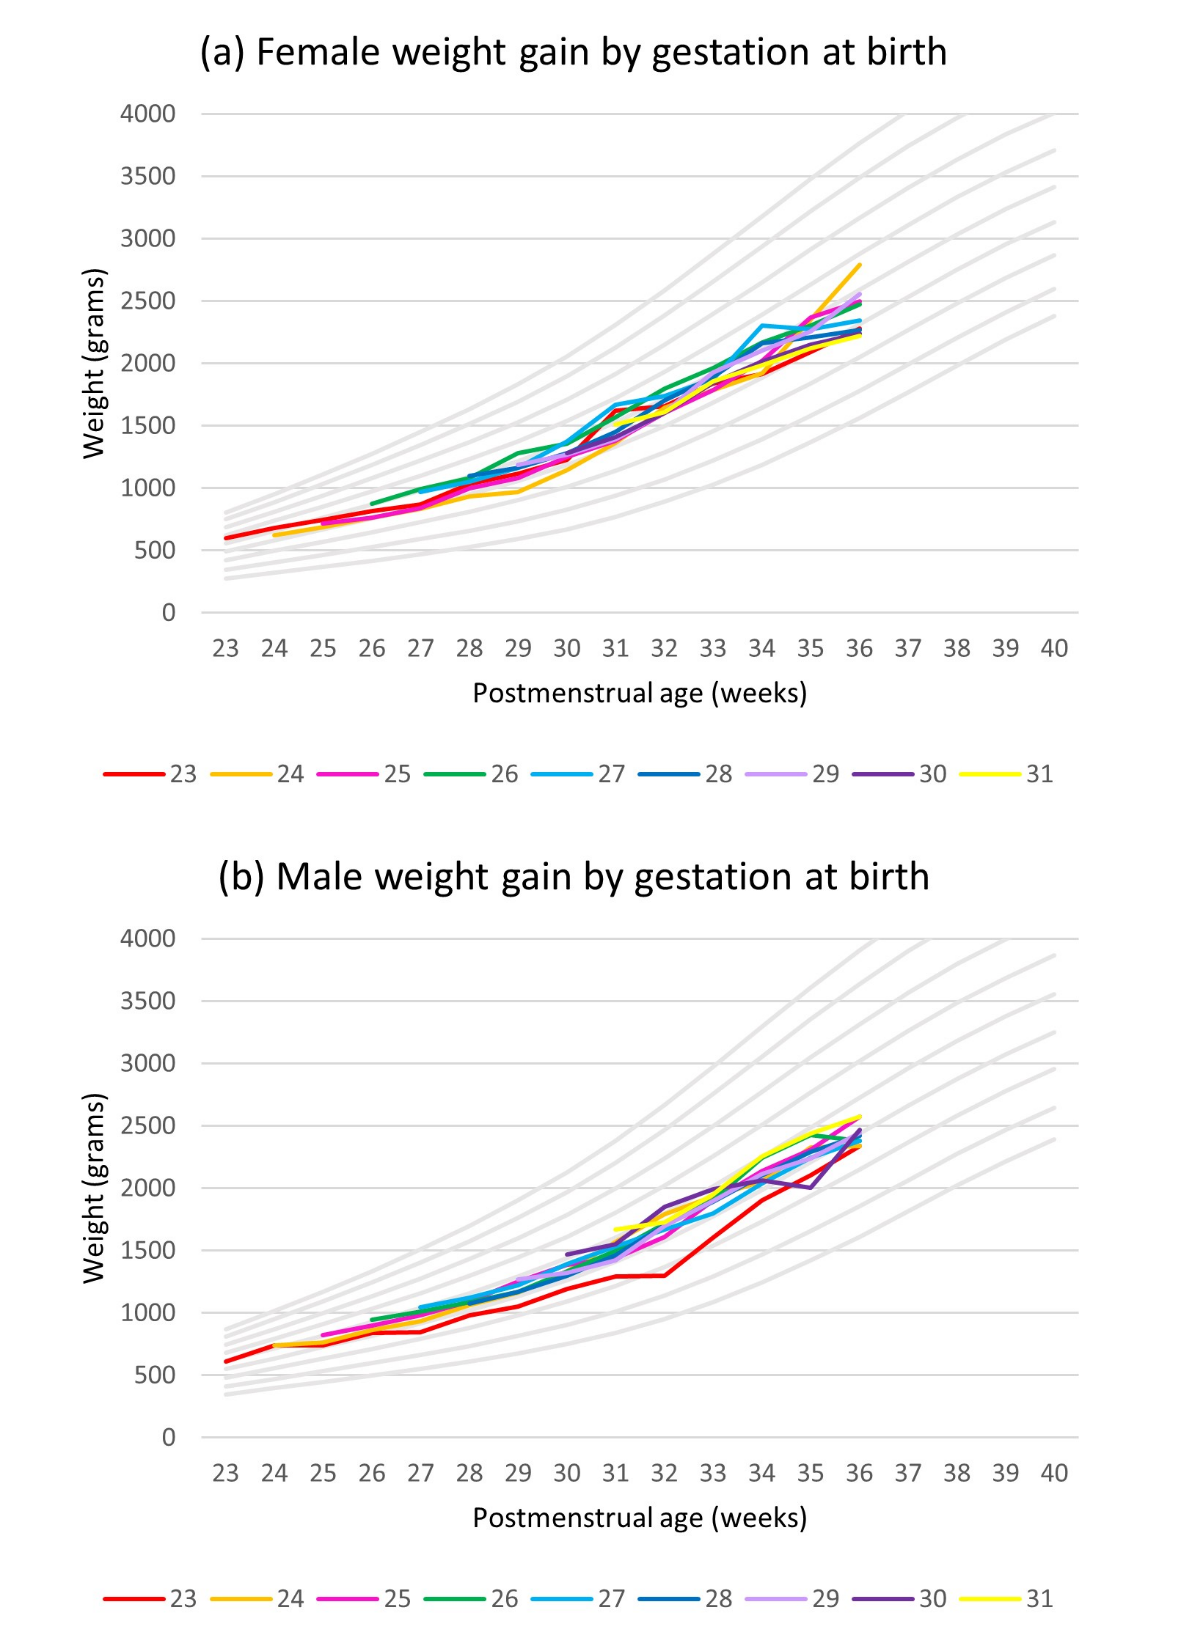

Supplement: inline-supplementary-material-1 [file inline-supplementary-material-1.docx]
